# Supplementary material
Source: PubMed Central journal article supplement (PMC8636503)
Supplement: NIHMS1716178-supplement-Supplement_Table_1.pdf [file NIHMS1716178-supplement-Supplement_Table_1.pdf]

**Supplemental Table 1.** Baseline demographic, and family and living situation measures of the sample with at least one follow-up and by symptom group (N=1129). Pairwise comparisons of interests are presented if p-values for tests of overall groups differences are less than 5%.

| Measures                       | Symptom Groups                  |             |                             |             |                               |             |                                        |             | Group Comparisons         |              |                        |                        |
|--------------------------------|---------------------------------|-------------|-----------------------------|-------------|-------------------------------|-------------|----------------------------------------|-------------|---------------------------|--------------|------------------------|------------------------|
|                                | At Least One Follow-up (N=1129) |             | Group 1: Persistent (N=141) |             | Group 2: Intermittent (N=235) |             | Group 3: Improving to Moderate (N=753) |             | Overall Group Differences |              | Pairwise: Group 1 vs 2 | Pairwise: Group 1 vs 3 |
|                                | N                               | % or M (SD) | N                           | % or M (SD) | N                             | % or M (SD) | N                                      | % or M (SD) | Test Statistic            | p-value      | p-value                | p-value                |
| <b>Demographics</b>            |                                 |             |                             |             |                               |             |                                        |             |                           |              |                        |                        |
| Age (years)                    | 1129                            | 21 (3)      | 141                         | 21 (3)      | 235                           | 21 (3)      | 753                                    | 21 (3)      | F(2, 1126)=0.13           | 0.877        |                        |                        |
| Gender                         |                                 |             |                             |             |                               |             |                                        |             | x <sup>2</sup> (4)=4.79   | 0.309        |                        |                        |
| Women                          | 294                             | 26%         | 28                          | 20%         | 64                            | 27%         | 202                                    | 27%         |                           |              |                        |                        |
| Men                            | 828                             | 73%         | 113                         | 80%         | 170                           | 72%         | 545                                    | 72%         |                           |              |                        |                        |
| Non-binary                     | 7                               | 1%          | 0                           | 0%          | 1                             | 0%          | 6                                      | 1%          |                           |              |                        |                        |
| Race                           |                                 |             |                             |             |                               |             |                                        |             | x <sup>2</sup> (10)=17.69 | 0.060        |                        |                        |
| White (Non-Hispanic)           | 277                             | 25%         | 36                          | 26%         | 52                            | 22%         | 189                                    | 25%         |                           |              |                        |                        |
| Black (Non-Hispanic)           | 397                             | 35%         | 51                          | 36%         | 91                            | 39%         | 255                                    | 34%         |                           |              |                        |                        |
| Asian (Non-Hispanic)           | 89                              | 8%          | 11                          | 8%          | 22                            | 9%          | 56                                     | 7%          |                           |              |                        |                        |
| Hispanic                       | 308                             | 27%         | 31                          | 22%         | 61                            | 26%         | 216                                    | 29%         |                           |              |                        |                        |
| Multiracial                    | 26                              | 2%          | 2                           | 1%          | 3                             | 1%          | 21                                     | 3%          |                           |              |                        |                        |
| Other/Unknown                  | 32                              | 3%          | 10                          | 7%          | 6                             | 3%          | 16                                     | 2%          |                           |              |                        |                        |
| Highest education level        |                                 |             |                             |             |                               |             |                                        |             | x <sup>2</sup> (6)=6.57   | 0.363        |                        |                        |
| <HS                            | 319                             | 28%         | 45                          | 32%         | 65                            | 28%         | 209                                    | 28%         |                           |              |                        |                        |
| HS or GED                      | 219                             | 19%         | 34                          | 24%         | 40                            | 17%         | 145                                    | 19%         |                           |              |                        |                        |
| Some college                   | 468                             | 42%         | 51                          | 36%         | 104                           | 44%         | 313                                    | 42%         |                           |              |                        |                        |
| College graduate or higher     | 121                             | 11%         | 10                          | 7%          | 25                            | 11%         | 86                                     | 11%         |                           |              |                        |                        |
| Insurance status               |                                 |             |                             |             |                               |             |                                        |             | x <sup>2</sup> (6)=17.49  | <b>0.008</b> | 0.067                  | <b>0.013</b>           |
| Uninsured                      | 52                              | 5%          | 14                          | 10%         | 8                             | 3%          | 30                                     | 4%          |                           |              |                        |                        |
| Public                         | 565                             | 50%         | 71                          | 50%         | 134                           | 57%         | 360                                    | 48%         |                           |              |                        |                        |
| Private                        | 440                             | 39%         | 47                          | 33%         | 79                            | 34%         | 314                                    | 42%         |                           |              |                        |                        |
| Other                          | 72                              | 6%          | 9                           | 6%          | 14                            | 6%          | 49                                     | 7%          |                           |              |                        |                        |
| <b>Family Living Situation</b> |                                 |             |                             |             |                               |             |                                        |             |                           |              |                        |                        |
| Lives with family              |                                 |             |                             |             |                               |             |                                        |             | x <sup>2</sup> (6)=4.98   | 0.547        |                        |                        |
| Parents                        | 941                             | 83%         | 111                         | 79%         | 192                           | 82%         | 638                                    | 85%         |                           |              |                        |                        |

| Measures                                                      | Symptom Groups                  |              |                             |               |                               |              |                                        |              | Group Comparisons         |                 |                        |                        |
|---------------------------------------------------------------|---------------------------------|--------------|-----------------------------|---------------|-------------------------------|--------------|----------------------------------------|--------------|---------------------------|-----------------|------------------------|------------------------|
|                                                               | At Least One Follow-up (N=1129) |              | Group 1: Persistent (N=141) |               | Group 2: Intermittent (N=235) |              | Group 3: Improving to Moderate (N=753) |              | Overall Group Differences |                 | Pairwise: Group 1 vs 2 | Pairwise: Group 1 vs 3 |
|                                                               | N                               | % or M (SD)  | N                           | % or M (SD)   | N                             | % or M (SD)  | N                                      | % or M (SD)  | Test Statistic            | p-value         | p-value                | p-value                |
| Other family (not parents)                                    | 90                              | 8%           | 14                          | 10%           | 18                            | 8%           | 58                                     | 8%           |                           |                 |                        |                        |
| Alone                                                         | 49                              | 4%           | 8                           | 6%            | 13                            | 6%           | 28                                     | 4%           |                           |                 |                        |                        |
| Other                                                         | 48                              | 4%           | 8                           | 6%            | 12                            | 5%           | 28                                     | 4%           |                           |                 |                        |                        |
| Current family contact                                        |                                 |              |                             |               |                               |              |                                        |              | $\chi^2(4)=6.44$          | 0.169           |                        |                        |
| Daily                                                         | 1020                            | 92%          | 123                         | 90%           | 203                           | 89%          | 694                                    | 93%          |                           |                 |                        |                        |
| Weekly                                                        | 66                              | 6%           | 8                           | 6%            | 19                            | 8%           | 39                                     | 5%           |                           |                 |                        |                        |
| Monthly or less                                               | 25                              | 2%           | 6                           | 4%            | 5                             | 2%           | 14                                     | 2%           |                           |                 |                        |                        |
| Homelessness (% yes)                                          | 60                              | 5%           | 16                          | 11%           | 16                            | 7%           | 28                                     | 4%           | $\chi^2(2)=15.05$         | <b>&lt;.001</b> | 0.127                  | <b>&lt;.001</b>        |
| <b>Clinical and Substance Use</b>                             |                                 |              |                             |               |                               |              |                                        |              |                           |                 |                        |                        |
| Primary diagnosis                                             |                                 |              |                             |               |                               |              |                                        |              | $\chi^2(6)=16.57$         | <b>0.011</b>    | 0.572                  | <b>0.016</b>           |
| Schizophrenia:295.90                                          | 335                             | 30%          | 55                          | 39%           | 79                            | 34%          | 201                                    | 27%          |                           |                 |                        |                        |
| Schizoaffective D/O:295.70                                    | 143                             | 13%          | 19                          | 13%           | 33                            | 14%          | 91                                     | 12%          |                           |                 |                        |                        |
| Schizophreniform D/O:295.40                                   | 282                             | 25%          | 29                          | 21%           | 62                            | 26%          | 191                                    | 25%          |                           |                 |                        |                        |
| Other                                                         | 369                             | 33%          | 38                          | 27%           | 61                            | 26%          | 270                                    | 36%          |                           |                 |                        |                        |
| Current prescription for antipsychotics                       |                                 |              |                             |               |                               |              |                                        |              | $\chi^2(6)=38.00$         | <b>&lt;.001</b> | <b>&lt;.001</b>        | <b>&lt;.001</b>        |
| Not medication adherent                                       | 146                             | 13%          | 31                          | 22%           | 29                            | 12%          | 86                                     | 11%          |                           |                 |                        |                        |
| Medication adherent                                           | 824                             | 73%          | 73                          | 52%           | 175                           | 74%          | 576                                    | 76%          |                           |                 |                        |                        |
| Not prescribed                                                | 54                              | 5%           | 12                          | 9%            | 9                             | 4%           | 33                                     | 4%           |                           |                 |                        |                        |
| Unknown                                                       | 105                             | 9%           | 25                          | 18%           | 22                            | 9%           | 58                                     | 8%           |                           |                 |                        |                        |
| Suicide ideation/attempt (% yes)                              | 301                             | 27%          | 40                          | 28%           | 65                            | 28%          | 196                                    | 26%          | $\chi^2(2)=0.48$          | 0.785           |                        |                        |
| Cannabis use (% yes)                                          | 448                             | 40%          | 64                          | 45%           | 109                           | 46%          | 275                                    | 37%          | $\chi^2(2)=9.47$          | <b>0.009</b>    | 0.852                  | <b>0.046</b>           |
| GAF occupational functioning                                  | 1115                            | 36 (20)      | 139                         | 32 (17)       | 232                           | 35 (19)      | 744                                    | 38 (20)      | F(2, 1112)<br>=5.66       | <b>0.004</b>    | 0.141                  | <b>0.002</b>           |
| GAF social functioning                                        | 1116                            | 58 (15)      | 138                         | 54 (15)       | 233                           | 57 (14)      | 745                                    | 58 (15)      | F(2, 1113)<br>=5.73       | <b>0.003</b>    | <b>0.019</b>           | <b>&lt;.001</b>        |
| <b>Pathways to Care</b>                                       |                                 |              |                             |               |                               |              |                                        |              |                           |                 |                        |                        |
| Time onset to program (days) median (IQR)                     | 1122                            | 161 (79-337) | 140                         | 223 (101-382) | 234                           | 191 (82-396) | 748                                    | 147 (76-310) | $\chi^2(2)=17.23$         | <b>&lt;.001</b> | 0.449                  | <b>&lt;.001</b>        |
| Time onset to 1st mental health Contact (days) median (IQR)   | 1090                            | 28 (2-95)    | 134                         | 31 (1-151)    | 229                           | 26 (0-105)   | 727                                    | 28 (3-89)    | $\chi^2(2)=1.40$          | 0.497           |                        |                        |
| Time 1st mental health contact to Program (days) median (IQR) | 1090                            | 75 (33-203)  | 134                         | 83 (36-262)   | 229                           | 94 (37-266)  | 727                                    | 70 (32-171)  | $\chi^2(2)=8.80$          | <b>0.012</b>    | 0.769                  | 0.069                  |

| Measures                                      | Symptom Groups                  |             |                             |             |                               |             |                                        |             | Group Comparisons         |         |                        |                        |
|-----------------------------------------------|---------------------------------|-------------|-----------------------------|-------------|-------------------------------|-------------|----------------------------------------|-------------|---------------------------|---------|------------------------|------------------------|
|                                               | At Least One Follow-up (N=1129) |             | Group 1: Persistent (N=141) |             | Group 2: Intermittent (N=235) |             | Group 3: Improving to Moderate (N=753) |             | Overall Group Differences |         | Pairwise: Group 1 vs 2 | Pairwise: Group 1 vs 3 |
|                                               | N                               | % or M (SD) | N                           | % or M (SD) | N                             | % or M (SD) | N                                      | % or M (SD) | Test Statistic            | p-value | p-value                | p-value                |
| Type of 1st mental health Contact             |                                 |             |                             |             |                               |             |                                        |             | $\chi^2(6)=8.92$          | 0.178   |                        |                        |
| ER, no hospitalization                        | 244                             | 22%         | 34                          | 25%         | 58                            | 25%         | 152                                    | 21%         |                           |         |                        |                        |
| Psych hospitalization (w/wo ER visit)         | 594                             | 54%         | 63                          | 47%         | 116                           | 51%         | 415                                    | 57%         |                           |         |                        |                        |
| Outpatient MH Treatment                       | 165                             | 15%         | 23                          | 17%         | 30                            | 13%         | 112                                    | 15%         |                           |         |                        |                        |
| Other                                         | 94                              | 9%          | 15                          | 11%         | 24                            | 11%         | 55                                     | 7%          |                           |         |                        |                        |
| Referral Source of 1st mental health Contact  |                                 |             |                             |             |                               |             |                                        |             | $\chi^2(14)=14.11$        | 0.442   |                        |                        |
| Self                                          | 108                             | 10%         | 12                          | 9%          | 32                            | 14%         | 64                                     | 8%          |                           |         |                        |                        |
| Family member                                 | 756                             | 67%         | 91                          | 65%         | 152                           | 65%         | 513                                    | 68%         |                           |         |                        |                        |
| S/O or friend                                 | 23                              | 2%          | 2                           | 1%          | 5                             | 2%          | 16                                     | 2%          |                           |         |                        |                        |
| School-Related Personnel                      | 64                              | 6%          | 7                           | 5%          | 17                            | 7%          | 40                                     | 5%          |                           |         |                        |                        |
| MH Care provider                              | 56                              | 5%          | 6                           | 4%          | 8                             | 3%          | 42                                     | 6%          |                           |         |                        |                        |
| Law Enforcement/EMS                           | 81                              | 7%          | 16                          | 11%         | 14                            | 6%          | 51                                     | 7%          |                           |         |                        |                        |
| Other                                         | 30                              | 3%          | 5                           | 4%          | 5                             | 2%          | 20                                     | 3%          |                           |         |                        |                        |
| Unknown                                       | 11                              | 1%          | 2                           | 1%          | 2                             | 1%          | 7                                      | 1%          |                           |         |                        |                        |
| <b>Prior Treatment and Service Use</b>        |                                 |             |                             |             |                               |             |                                        |             |                           |         |                        |                        |
| Ever had psychiatric hospitalizations (% yes) | 975                             | 87%         | 118                         | 85%         | 209                           | 89%         | 648                                    | 87%         | $\chi^2(2)=1.64$          | 0.441   |                        |                        |

**Supplemental Table 2.** Baseline demographic, and family and living situation measures of the sample with enrolled in the program for at least one year by symptom group (N=869). Pairwise comparisons of interests are presented if p-values for tests of overall groups differences are less than 5%.

| Measures                       | Symptom Groups                       |             |                            |             |                               |             |                                        |             | Group Comparisons         |         |                        |                        |
|--------------------------------|--------------------------------------|-------------|----------------------------|-------------|-------------------------------|-------------|----------------------------------------|-------------|---------------------------|---------|------------------------|------------------------|
|                                | At Least one-year enrollment (N=869) |             | Group 1: Persistent (N=59) |             | Group 2: Intermittent (N=220) |             | Group 3: Improving to Moderate (N=590) |             | Overall Group Differences |         | Pairwise: Group 1 vs 2 | Pairwise: Group 1 vs 3 |
|                                | N                                    | % or M (SD) | N                          | % or M (SD) | N                             | % or M (SD) | N                                      | % or M (SD) | Test Statistic            | p-value | p-value                | p-value                |
| <b>Demographics</b>            |                                      |             |                            |             |                               |             |                                        |             |                           |         |                        |                        |
| Age (years)                    | 869                                  | 21 (3)      | 59                         | 21 (3)      | 220                           | 21 (3)      | 590                                    | 21 (3)      | F(2, 866)<br>=0.61        | 0.543   |                        |                        |
| Gender                         |                                      |             |                            |             |                               |             |                                        |             | $\chi^2(4)=3.43$          | 0.489   |                        |                        |
| Women                          | 228                                  | 26%         | 10                         | 17%         | 59                            | 27%         | 159                                    | 27%         |                           |         |                        |                        |
| Men                            | 636                                  | 73%         | 49                         | 83%         | 160                           | 73%         | 427                                    | 72%         |                           |         |                        |                        |
| Non-binary                     | 5                                    | 1%          | 0                          | 0%          | 1                             | 0%          | 4                                      | 1%          |                           |         |                        |                        |
| Race                           |                                      |             |                            |             |                               |             |                                        |             | $\chi^2(10)=8.88$         | 0.543   |                        |                        |
| White (Non-Hispanic)           | 218                                  | 25%         | 19                         | 32%         | 50                            | 23%         | 149                                    | 25%         |                           |         |                        |                        |
| Black (Non-Hispanic)           | 303                                  | 35%         | 19                         | 32%         | 84                            | 38%         | 200                                    | 34%         |                           |         |                        |                        |
| Asian (Non-Hispanic)           | 68                                   | 8%          | 5                          | 8%          | 20                            | 9%          | 43                                     | 7%          |                           |         |                        |                        |
| Hispanic                       | 236                                  | 27%         | 11                         | 19%         | 57                            | 26%         | 168                                    | 28%         |                           |         |                        |                        |
| Multiracial                    | 22                                   | 3%          | 2                          | 3%          | 3                             | 1%          | 17                                     | 3%          |                           |         |                        |                        |
| Other/Unknown                  | 22                                   | 3%          | 3                          | 5%          | 6                             | 3%          | 13                                     | 2%          |                           |         |                        |                        |
| Highest education level        |                                      |             |                            |             |                               |             |                                        |             | $\chi^2(6)=1.67$          | 0.948   |                        |                        |
| <HS                            | 242                                  | 28%         | 19                         | 32%         | 59                            | 27%         | 164                                    | 28%         |                           |         |                        |                        |
| HS or GED                      | 164                                  | 19%         | 11                         | 19%         | 39                            | 18%         | 114                                    | 19%         |                           |         |                        |                        |
| Some college                   | 369                                  | 43%         | 24                         | 41%         | 99                            | 45%         | 246                                    | 42%         |                           |         |                        |                        |
| College graduate or higher     | 93                                   | 11%         | 5                          | 8%          | 22                            | 10%         | 66                                     | 11%         |                           |         |                        |                        |
| Insurance status               |                                      |             |                            |             |                               |             |                                        |             | $\chi^2(6)=7.82$          | 0.251   |                        |                        |
| Uninsured                      | 34                                   | 4%          | 4                          | 7%          | 7                             | 3%          | 23                                     | 4%          |                           |         |                        |                        |
| Public                         | 421                                  | 48%         | 26                         | 44%         | 123                           | 56%         | 272                                    | 46%         |                           |         |                        |                        |
| Private                        | 357                                  | 41%         | 25                         | 42%         | 77                            | 35%         | 255                                    | 43%         |                           |         |                        |                        |
| Other                          | 57                                   | 7%          | 4                          | 7%          | 13                            | 6%          | 40                                     | 7%          |                           |         |                        |                        |
| <b>Family Living Situation</b> |                                      |             |                            |             |                               |             |                                        |             |                           |         |                        |                        |
| Lives with family              |                                      |             |                            |             |                               |             |                                        |             | $\chi^2(6)=3.35$          | 0.764   |                        |                        |
| Parents                        | 742                                  | 85%         | 52                         | 88%         | 184                           | 84%         | 506                                    | 86%         |                           |         |                        |                        |
| Other family (not parents)     | 59                                   | 7%          | 3                          | 5%          | 14                            | 6%          | 42                                     | 7%          |                           |         |                        |                        |

| Measures                                                      | Symptom Groups                       |              |                            |               |                               |              |                                        |              | Group Comparisons         |                 |                        |                        |
|---------------------------------------------------------------|--------------------------------------|--------------|----------------------------|---------------|-------------------------------|--------------|----------------------------------------|--------------|---------------------------|-----------------|------------------------|------------------------|
|                                                               | At Least one-year enrollment (N=869) |              | Group 1: Persistent (N=59) |               | Group 2: Intermittent (N=220) |              | Group 3: Improving to Moderate (N=590) |              | Overall Group Differences |                 | Pairwise: Group 1 vs 2 | Pairwise: Group 1 vs 3 |
|                                                               | N                                    | % or M (SD)  | N                          | % or M (SD)   | N                             | % or M (SD)  | N                                      | % or M (SD)  | Test Statistic            | p-value         | p-value                | p-value                |
| Alone                                                         | 32                                   | 4%           | 1                          | 2%            | 11                            | 5%           | 20                                     | 3%           |                           |                 |                        |                        |
| Other                                                         | 35                                   | 4%           | 3                          | 5%            | 11                            | 5%           | 21                                     | 4%           |                           |                 |                        |                        |
| Current family contact                                        |                                      |              |                            |               |                               |              |                                        |              | $\chi^2(4)=2.42$          | 0.660           |                        |                        |
| Daily                                                         | 791                                  | 93%          | 54                         | 93%           | 191                           | 90%          | 546                                    | 93%          |                           |                 |                        |                        |
| Weekly                                                        | 48                                   | 6%           | 3                          | 5%            | 16                            | 8%           | 29                                     | 5%           |                           |                 |                        |                        |
| Monthly or less                                               | 16                                   | 2%           | 1                          | 2%            | 5                             | 2%           | 10                                     | 2%           |                           |                 |                        |                        |
| Homelessness (% yes)                                          | 42                                   | 5%           | 6                          | 10%           | 16                            | 7%           | 20                                     | 3%           | $\chi^2(2)=9.17$          | <b>0.010</b>    | 0.463                  | <b>0.011</b>           |
| <b>Clinical and Substance Use</b>                             |                                      |              |                            |               |                               |              |                                        |              |                           |                 |                        |                        |
| Primary diagnosis                                             |                                      |              |                            |               |                               |              |                                        |              | $\chi^2(6)=22.44$         | <b>0.001</b>    | 0.068                  | <b>&lt;.001</b>        |
| Schizophrenia:295.90                                          | 265                                  | 30%          | 31                         | 53%           | 75                            | 34%          | 159                                    | 27%          |                           |                 |                        |                        |
| Schizoaffective D/O:295.70                                    | 106                                  | 12%          | 6                          | 10%           | 31                            | 14%          | 69                                     | 12%          |                           |                 |                        |                        |
| Schizophreniform D/O:295.40                                   | 217                                  | 25%          | 9                          | 15%           | 56                            | 25%          | 152                                    | 26%          |                           |                 |                        |                        |
| Other                                                         | 281                                  | 32%          | 13                         | 22%           | 58                            | 26%          | 210                                    | 36%          |                           |                 |                        |                        |
| Current prescription for antipsychotics                       |                                      |              |                            |               |                               |              |                                        |              | $\chi^2(6)=22.99$         | <b>&lt;.001</b> | <b>0.013</b>           | <b>&lt;.001</b>        |
| Not medication adherent                                       | 97                                   | 11%          | 7                          | 12%           | 28                            | 13%          | 62                                     | 11%          |                           |                 |                        |                        |
| Medication adherent                                           | 660                                  | 76%          | 34                         | 58%           | 163                           | 74%          | 463                                    | 78%          |                           |                 |                        |                        |
| Not prescribed                                                | 38                                   | 4%           | 4                          | 7%            | 9                             | 4%           | 25                                     | 4%           |                           |                 |                        |                        |
| Unknown                                                       | 74                                   | 9%           | 14                         | 24%           | 20                            | 9%           | 40                                     | 7%           |                           |                 |                        |                        |
| Suicide ideation/attempt (% yes)                              | 234                                  | 27%          | 16                         | 27%           | 62                            | 28%          | 156                                    | 26%          | $\chi^2(2)=0.25$          | 0.883           |                        |                        |
| Cannabis use (% yes)                                          | 328                                  | 38%          | 21                         | 36%           | 103                           | 47%          | 204                                    | 35%          | $\chi^2(2)=10.34$         | <b>0.006</b>    | 0.123                  | 0.876                  |
| GAF occupational functioning                                  | 858                                  | 36 (20)      | 57                         | 30 (15)       | 217                           | 35 (19)      | 584                                    | 37 (20)      | F(2, 855)<br>=4.12        | <b>0.017</b>    | 0.093                  | <b>0.010</b>           |
| GAF social functioning                                        | 860                                  | 58 (15)      | 57                         | 55 (14)       | 218                           | 57 (15)      | 585                                    | 58 (15)      | F(2, 857)<br>=1.28        | 0.279           |                        |                        |
| <b>Pathways to Care</b>                                       |                                      |              |                            |               |                               |              |                                        |              |                           |                 |                        |                        |
| Time onset to program (days) median (IQR)                     | 863                                  | 166 (82-342) | 58                         | 249 (145-420) | 219                           | 191 (82-396) | 586                                    | 151 (77-313) | $\chi^2(2)=14.16$         | <b>&lt;.001</b> | 0.169                  | <b>0.002</b>           |
| Time onset to 1st mental health contact (days) median (IQR)   | 835                                  | 28 (2-95)    | 54                         | 42 (3-153)    | 215                           | 25 (0-106)   | 566                                    | 28 (3-89)    | $\chi^2(2)=1.58$          | 0.453           |                        |                        |
| Time 1st mental health contact to program (days) median (IQR) | 835                                  | 78 (34-212)  | 54                         | 150 (37-290)  | 215                           | 94 (37-266)  | 566                                    | 74 (33-187)  | $\chi^2(2)=7.45$          | <b>0.024</b>    | 0.580                  | 0.050                  |
| Type of 1st mental health Contact                             |                                      |              |                            |               |                               |              |                                        |              | $\chi^2(6)=9.10$          | 0.168           |                        |                        |

|                                               | Symptom Groups                       |             |                            |             |                               |             |                                        |             |                           | Group Comparisons |                        |                        |  |
|-----------------------------------------------|--------------------------------------|-------------|----------------------------|-------------|-------------------------------|-------------|----------------------------------------|-------------|---------------------------|-------------------|------------------------|------------------------|--|
|                                               | At Least one-year enrollment (N=869) |             | Group 1: Persistent (N=59) |             | Group 2: Intermittent (N=220) |             | Group 3: Improving to Moderate (N=590) |             | Overall Group Differences |                   | Pairwise: Group 1 vs 2 | Pairwise: Group 1 vs 3 |  |
|                                               | N                                    | % or M (SD) | N                          | % or M (SD) | N                             | % or M (SD) | N                                      | % or M (SD) | Test Statistic            | p-value           | p-value                | p-value                |  |
| <b>Measures</b>                               |                                      |             |                            |             |                               |             |                                        |             |                           |                   |                        |                        |  |
| ER, no hospitalization                        | 197                                  | 23%         | 15                         | 26%         | 56                            | 26%         | 126                                    | 22%         |                           |                   |                        |                        |  |
| Psych hospitalization (w/wo ER visit)         | 436                                  | 52%         | 22                         | 39%         | 105                           | 49%         | 309                                    | 54%         |                           |                   |                        |                        |  |
| Outpatient MH Treatment                       | 134                                  | 16%         | 12                         | 21%         | 29                            | 14%         | 93                                     | 16%         |                           |                   |                        |                        |  |
| Other                                         | 78                                   | 9%          | 8                          | 14%         | 24                            | 11%         | 46                                     | 8%          |                           |                   |                        |                        |  |
| Referral Source of 1st mental health Contact  |                                      |             |                            |             |                               |             |                                        |             | x <sup>2</sup> (14)=14.95 | 0.382             |                        |                        |  |
| Self                                          | 83                                   | 10%         | 4                          | 7%          | 30                            | 14%         | 49                                     | 8%          |                           |                   |                        |                        |  |
| Family member                                 | 585                                  | 67%         | 42                         | 71%         | 141                           | 64%         | 402                                    | 68%         |                           |                   |                        |                        |  |
| S/O or friend                                 | 12                                   | 1%          | 0                          | 0%          | 5                             | 2%          | 7                                      | 1%          |                           |                   |                        |                        |  |
| School-Related Personnel                      | 53                                   | 6%          | 2                          | 3%          | 16                            | 7%          | 35                                     | 6%          |                           |                   |                        |                        |  |
| MH Care provider                              | 47                                   | 5%          | 2                          | 3%          | 7                             | 3%          | 38                                     | 6%          |                           |                   |                        |                        |  |
| Law Enforcement/EMS                           | 56                                   | 6%          | 5                          | 8%          | 14                            | 6%          | 37                                     | 6%          |                           |                   |                        |                        |  |
| Other                                         | 24                                   | 3%          | 3                          | 5%          | 5                             | 2%          | 16                                     | 3%          |                           |                   |                        |                        |  |
| Unknown                                       | 9                                    | 1%          | 1                          | 2%          | 2                             | 1%          | 6                                      | 1%          |                           |                   |                        |                        |  |
| <b>Prior Treatment and Service Use</b>        |                                      |             |                            |             |                               |             |                                        |             |                           |                   |                        |                        |  |
| Ever had psychiatric hospitalizations (% yes) | 751                                  | 87%         | 49                         | 84%         | 195                           | 89%         | 507                                    | 87%         | x <sup>2</sup> (2)=1.07   | 0.584             |                        |                        |  |
